# Supplementary material
Source: MDPI journal article supplement (https://www.mdpi.com/2075-163X/12/3/346)
Supplement: s1 [file s1]

# Supplementary Materials—Archaeometric Study on Roman Terracottas from the Sanctuary of Hercules in Alba Fucens (Abruzzo, Italy)

Gilda Russo, Emanuela Ceccaroni, Aida Maria Conte, Laura Medeghini, Caterina De Vito and Silvano Mignardi \*

## Content of listed material

**Table S1.** pXRF counts (%) for all pigments of samples 1–5.

**Table S2.** pXRF counts (%) for all ceramic bodies of samples 1–5.

**Table S3.** pXRF counts (%) of Mn and Fe for red pigments.

**Table S1.** pXRF counts (%) for all pigments of samples 1–5. bdl = below detection limit.

| Pigment/Sample        | K    | Ca    | Ti   | Mn   | Fe    | Cu    | As   | Zn   | Sr   | Zr   | Pb   |
|-----------------------|------|-------|------|------|-------|-------|------|------|------|------|------|
| White - sample 2      | 0.75 | 60.17 | bdl  | 2.85 | 22.81 | 0.68  | 3.16 | bdl  | 0.97 | 0.40 | 1.53 |
| White - sample 3      | 0.80 | 60.71 | bdl  | 1.90 | 12.62 | 6.97  | bdl  | bdl  | 1.79 | 0.98 | 2.70 |
| White - sample 4      | 0.97 | 45.79 | 0.62 | 0.63 | 42.15 | bdl   | bdl  | bdl  | 1.23 | 0.67 | bdl  |
| White - sample 5      | 0.93 | 64.23 | bdl  | 1.26 | 21.48 | bdl   | bdl  | bdl  | 0.77 | 0.65 | 2.36 |
| Black - sample 2      | 0.58 | 47.44 | 0.33 | 4.20 | 35.14 | 1.78  | bdl  | bdl  | 1.01 | 0.66 | 2.37 |
| Black - sample 3      | 0.80 | 71.61 | 0.24 | 1.56 | 15.65 | 1.03  | bdl  | bdl  | 0.83 | 0.72 | bdl  |
| Black - sample 4      | 0.78 | 69.70 | 0.31 | 0.78 | 18.27 | bdl   | bdl  | bdl  | 0.76 | 0.76 | 1.65 |
| Light blue - sample 1 | 0.42 | 31.91 | 0.43 | 1.04 | 17.51 | 40.80 | bdl  | 0.90 | 0.92 | 0.58 | bdl  |
| Light blue - sample 2 | 0.08 | 5.62  | bdl  | 0.09 | 5.35  | 83.84 | bdl  | bdl  | 0.28 | 0.15 | 1.89 |
| Light blue Sample 4   | 0.21 | 34.20 | 0.32 | 1.23 | 17.63 | 29.81 | bdl  | 0.92 | 1.55 | 0.88 | 3.73 |
| Light blue - sample 5 | 0.64 | 34.60 | 0.45 | 1.38 | 12.95 | 40.10 | bdl  | bdl  | 0.93 | 0.33 | 2.13 |
| Red - sample 1        | 0.41 | 15.42 | 1.20 | 0.91 | 77.26 | bdl   | bdl  | bdl  | 0.59 | 0.37 | bdl  |
| Red - sample 2        | 0.66 | 32.60 | 0.45 | 1.32 | 57.58 | 1.01  | bdl  | bdl  | 0.55 | 0.35 | 1.15 |
| Red - sample 3        | 0.81 | 64.33 | bdl  | 1.39 | 22.50 | 1.05  | bdl  | bdl  | 0.83 | 0.64 | 0.85 |
| Red - sample 4        | 0.32 | 24.31 | 0.37 | 0.41 | 69.15 | 0.51  | bdl  | bdl  | 0.45 | 0.26 | bdl  |
| Red - sample 5        | 0.76 | 14.95 | 0.74 | 2.15 | 66.81 | 5.90  | bdl  | bdl  | 0.88 | 0.48 | 1.49 |
| Pink - sample 1       | 0.67 | 49.89 | 0.44 | 0.99 | 37.59 | 0.98  | bdl  | bdl  | 1.22 | 0.68 | bdl  |

**Table S2.** pXRF counts (%) for all ceramic bodies of samples 1–5.

| Sample         | K    | Ca    | Ti   | Mn   | Fe    | Cu  | As  | Zn  | Sr   | Zr   | Pb  |
|----------------|------|-------|------|------|-------|-----|-----|-----|------|------|-----|
| Sample 1       | 0.75 | 10.66 | 1.04 | 1.04 | 77.45 | bdl | bdl | bdl | 1.29 | 1.05 | bdl |
| Sample 2       | 1.54 | 18.73 | 1.46 | 2.00 | 76.17 | bdl | bdl | bdl | 0.76 | 0.70 | bdl |
| Sample 3       | 0.47 | 7.12  | 0.89 | 1.39 | 76.25 | bdl | bdl | bdl | 2.36 | 1.06 | bdl |
| Sample 4       | 1.23 | 14.13 | 1.16 | 1.23 | 74.51 | bdl | bdl | bdl | 0.93 | 0.38 | bdl |
| Sample 5       | 0.91 | 16.59 | 1.09 | 1.67 | 71.06 | bdl | bdl | bdl | 1.28 | 0.43 | bdl |
| Average Matrix | 0.98 | 13.45 | 1.13 | 1.47 | 75.09 | bdl | bdl | bdl | 1.32 | 0.72 | bdl |

**Table S3.** pXRF counts (%) of Mn and Fe for red pigments.

| Pigment/Sample | Mn   | Fe    | Fe/Mn  |
|----------------|------|-------|--------|
| Red - sample 1 | 0.91 | 77.26 | 84.90  |
| Red - sample 2 | 1.32 | 57.58 | 43.62  |
| Red - sample 3 | 1.39 | 22.50 | 16.19  |
| Red - sample 4 | 0.41 | 69.15 | 168.66 |
| Red - sample 5 | 2.15 | 66.81 | 31.07  |
